# Supplementary material
Source: Springer Nature journal article supplement (https://www.springermedizin.de/resource/supplementary/12887_2013_1006_MOESM2_ESM.pdf/9476902)

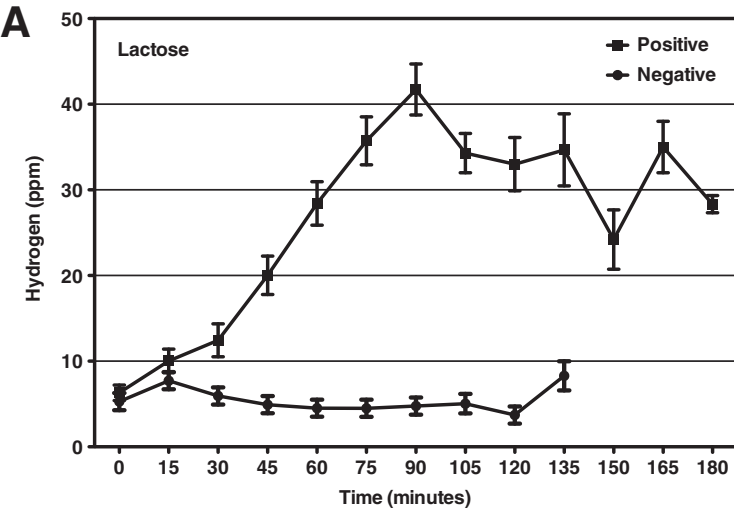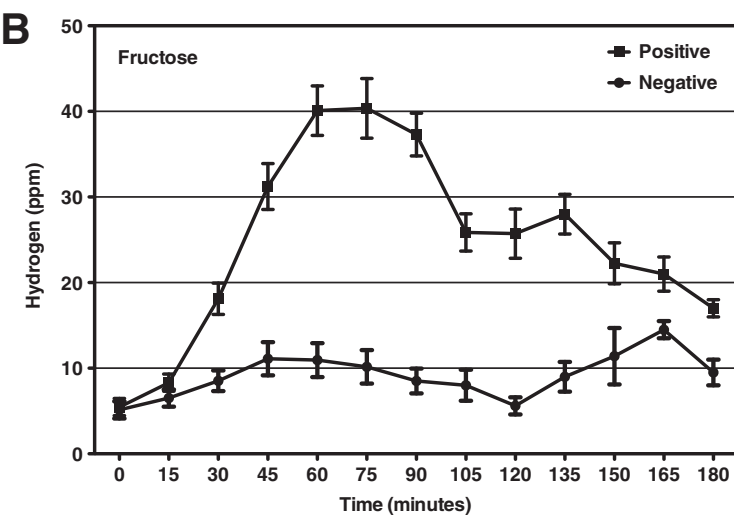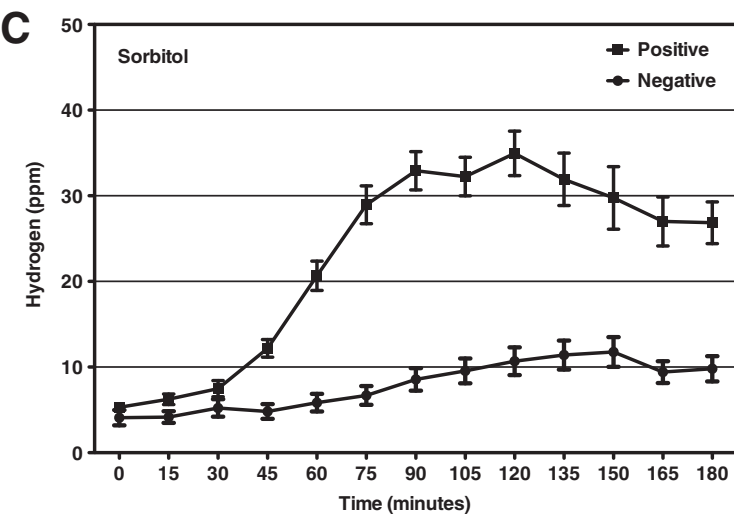

Supplement: MOESM2 [file 9476902]
